# Supplementary material for: Membrane-anchored substrate binding proteins are deployed in secondary TAXI transporters
Source: publisher site journal article supplement (doi:10.1515/hsz-2022-0337), 2023-03-15
Supplement: Supplementary file 1 [file j_hsz-2022-0337_suppl_001.pdf]

# **Membrane-anchored substrate binding proteins are deployed in secondary TAXI transporters**

Anja Roden, Melanie K. Engelin, Klaas M. Pos and Eric R. Geertsma

## **Supplementary Figures**

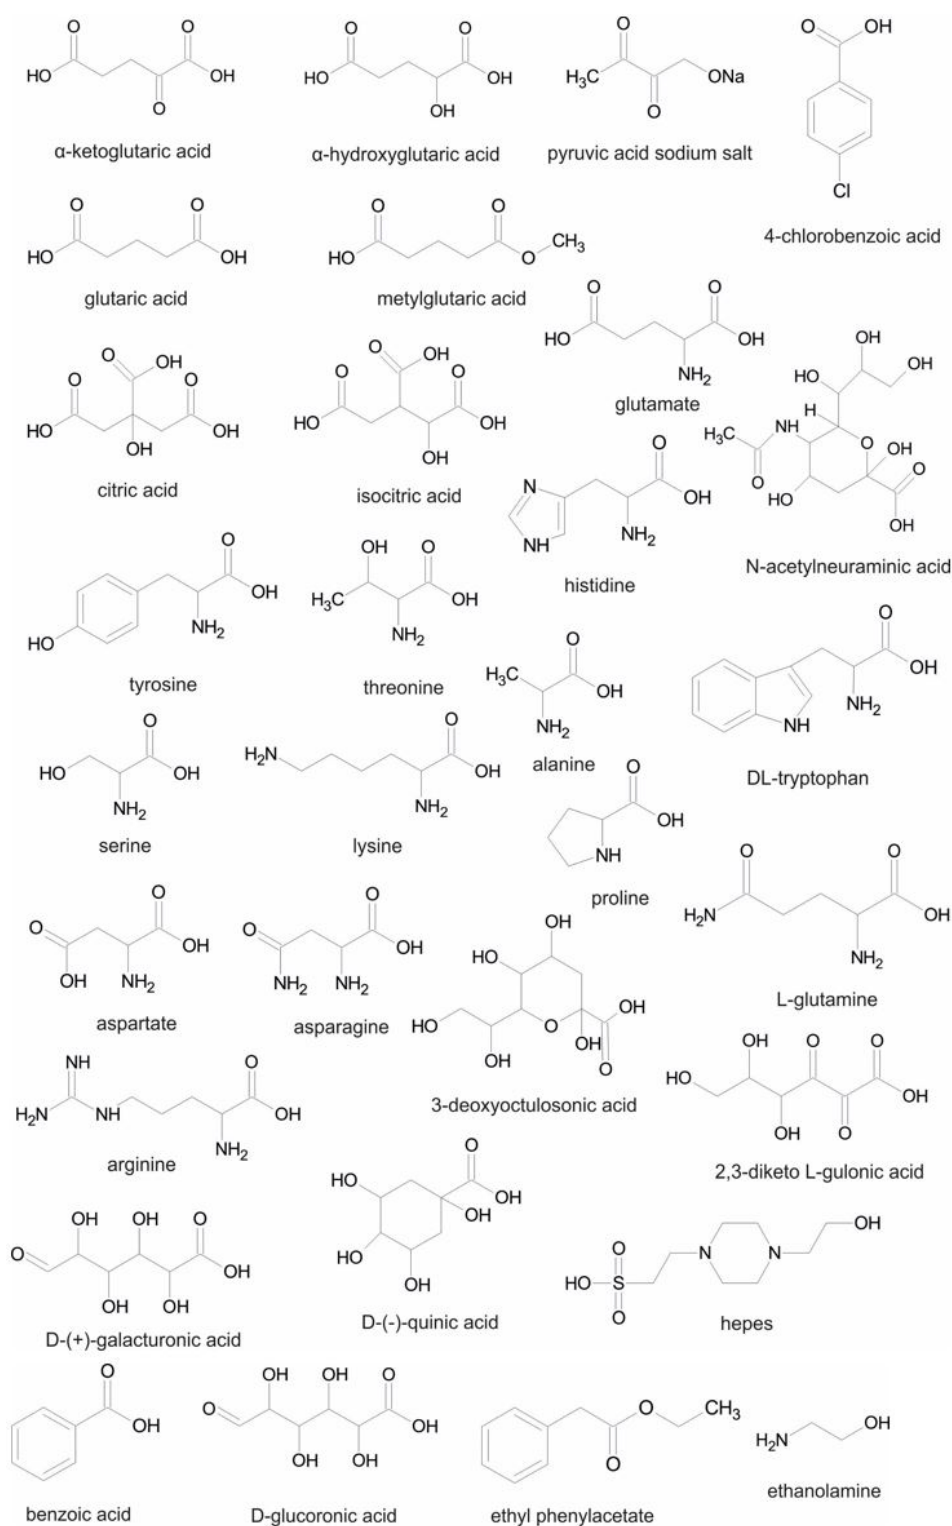

**Supplementary Fig. 1:** Composition of the compound library used for TAXIPm-P deorphanization.

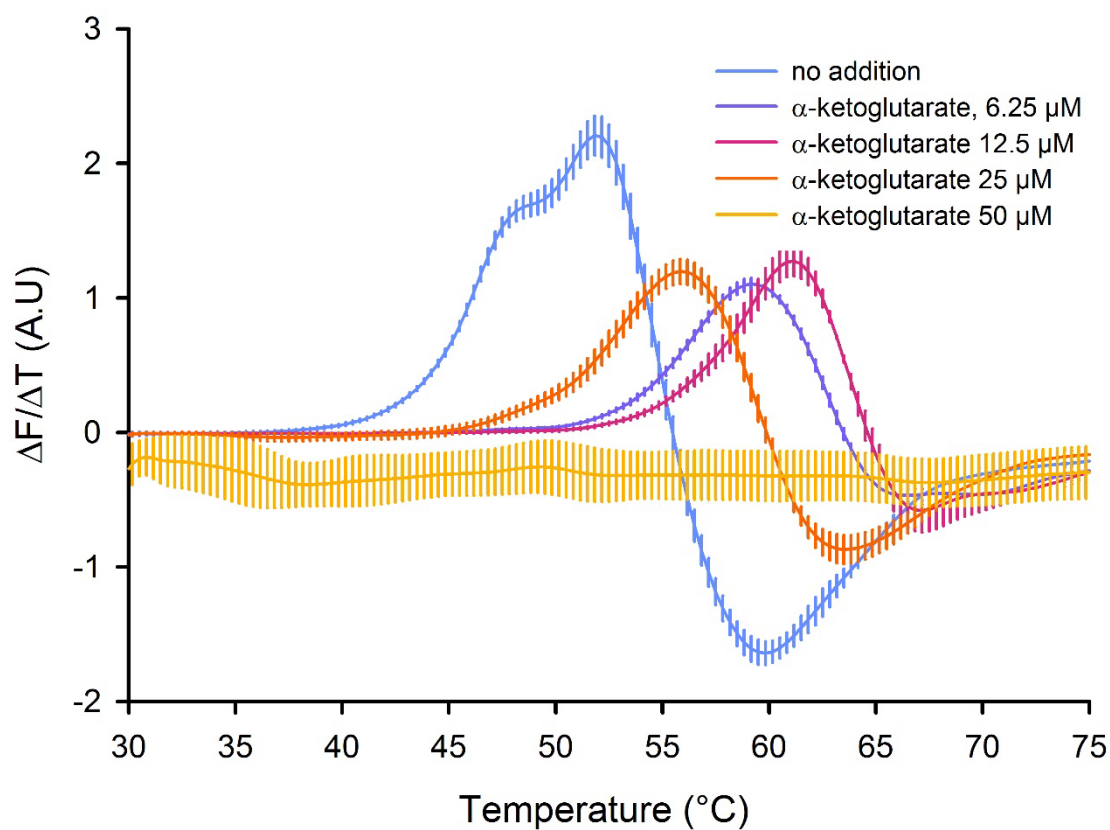

**Supplementary Fig. 2:** Differential scanning fluorimetry of TAXIPm-P without any addition or in the presence of increasing concentrations of  $\alpha$ -ketoglutarate. The peak in the first derivative of the curve indicates the melting temperature. Curves represent average values of triplicates with standard errors.

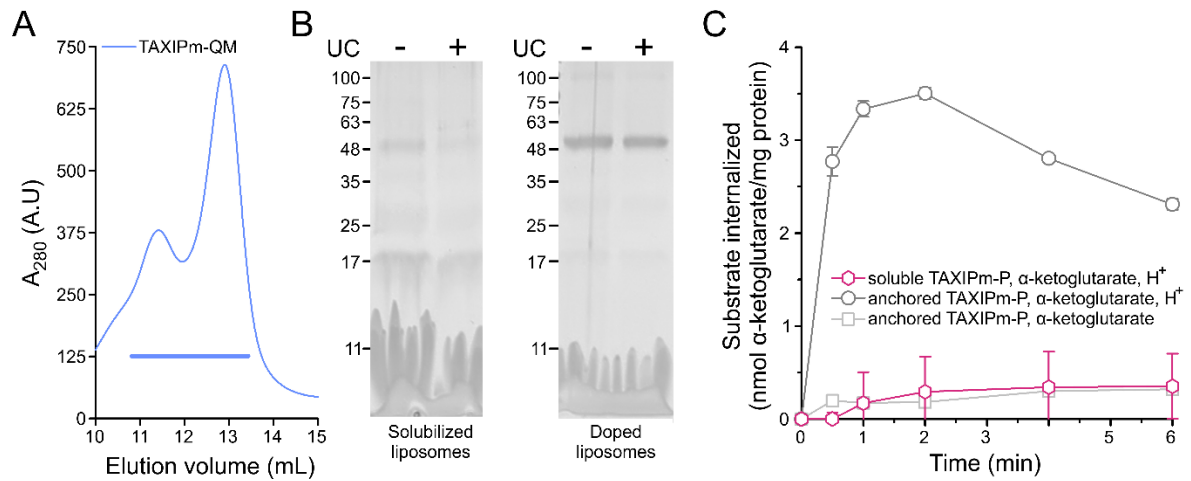

**Supplementary Fig. 3: (A)** Size-exclusion chromatography of TAXIPm-QM in 0.2% (w/v) DM. Thick line below the curve indicates the fractions pooled and used for reconstitution. **(B)** Assessment of the reconstitution efficiency of TAXIPm-QM. TAXIPm-QM was reconstituted using detergent-solubilized liposomes (left panel) or detergent-doped liposomes (right panel). Coomassie-stained SDS-PAA-gel of DDM-solubilized proteoliposomes before (minus) ultracentrifugation and the supernatant following ultracentrifugation (plus). **(C)** Time-dependent uptake of 10  $\mu\text{M}$  [ $^{14}\text{C}$ ]- $\alpha$ -ketoglutarate into TAXIPm-QM proteoliposomes at 20  $^{\circ}\text{C}$  in the presence of 5  $\mu\text{M}$  soluble TAXIPm-P (pink trace). Gray traces indicate reference data obtained for proteoliposomes containing TAXIPm-QM and membrane-anchored TAXIPm-P.  $\text{H}^+$ , and  $\alpha$ -ketoglutarate refer to inwardly-directed proton- (out: pH 6.0; in: pH 7.5), and  $\alpha$ -ketoglutarate-gradients (out: 10  $\mu\text{M}$ ; in: 0  $\mu\text{M}$ ; symmetrical pH 7.5 unless otherwise stated).

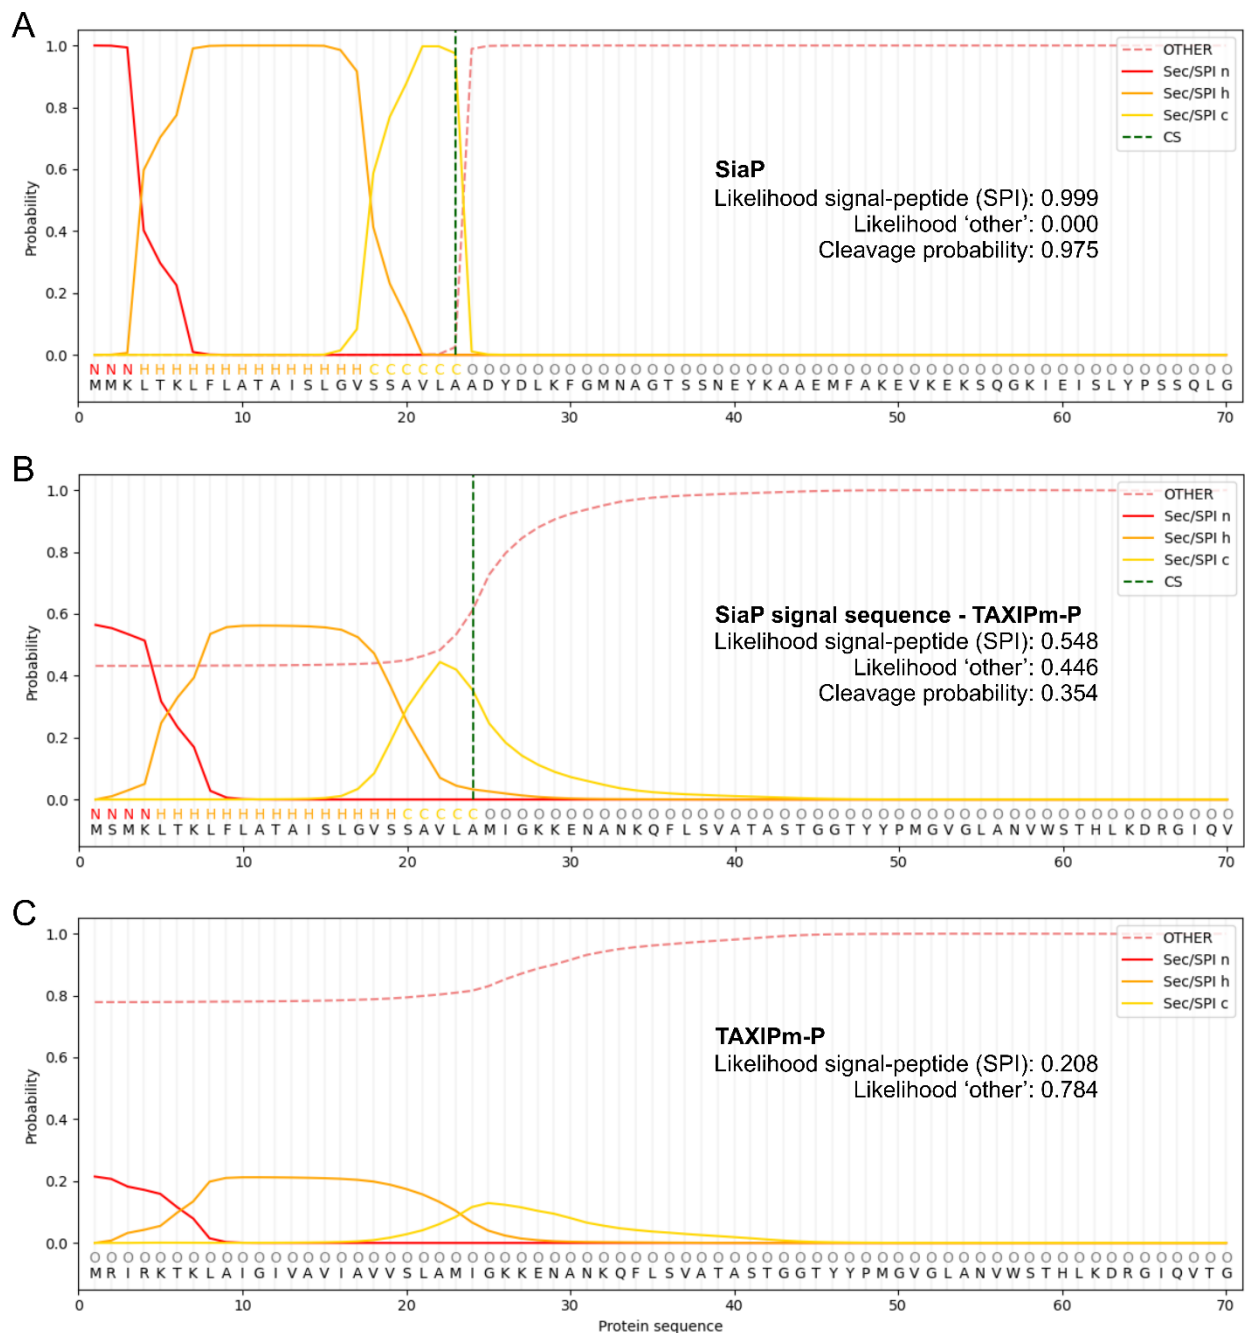

**Supplementary Fig. 4:** SignalP 6.0 analysis of **(A)** SiaP from *H. influenzae*, **(B)** TAXIPm-P expressed with the signal sequence derived from SiaP, and **(C)** TAXIPm-P. The likelihood for a signalpeptidase I signal sequence and a sequence that cannot be assigned to known signal peptides (designated 'other') are indicated in the figure, together with the predicted cleavage probabilities.

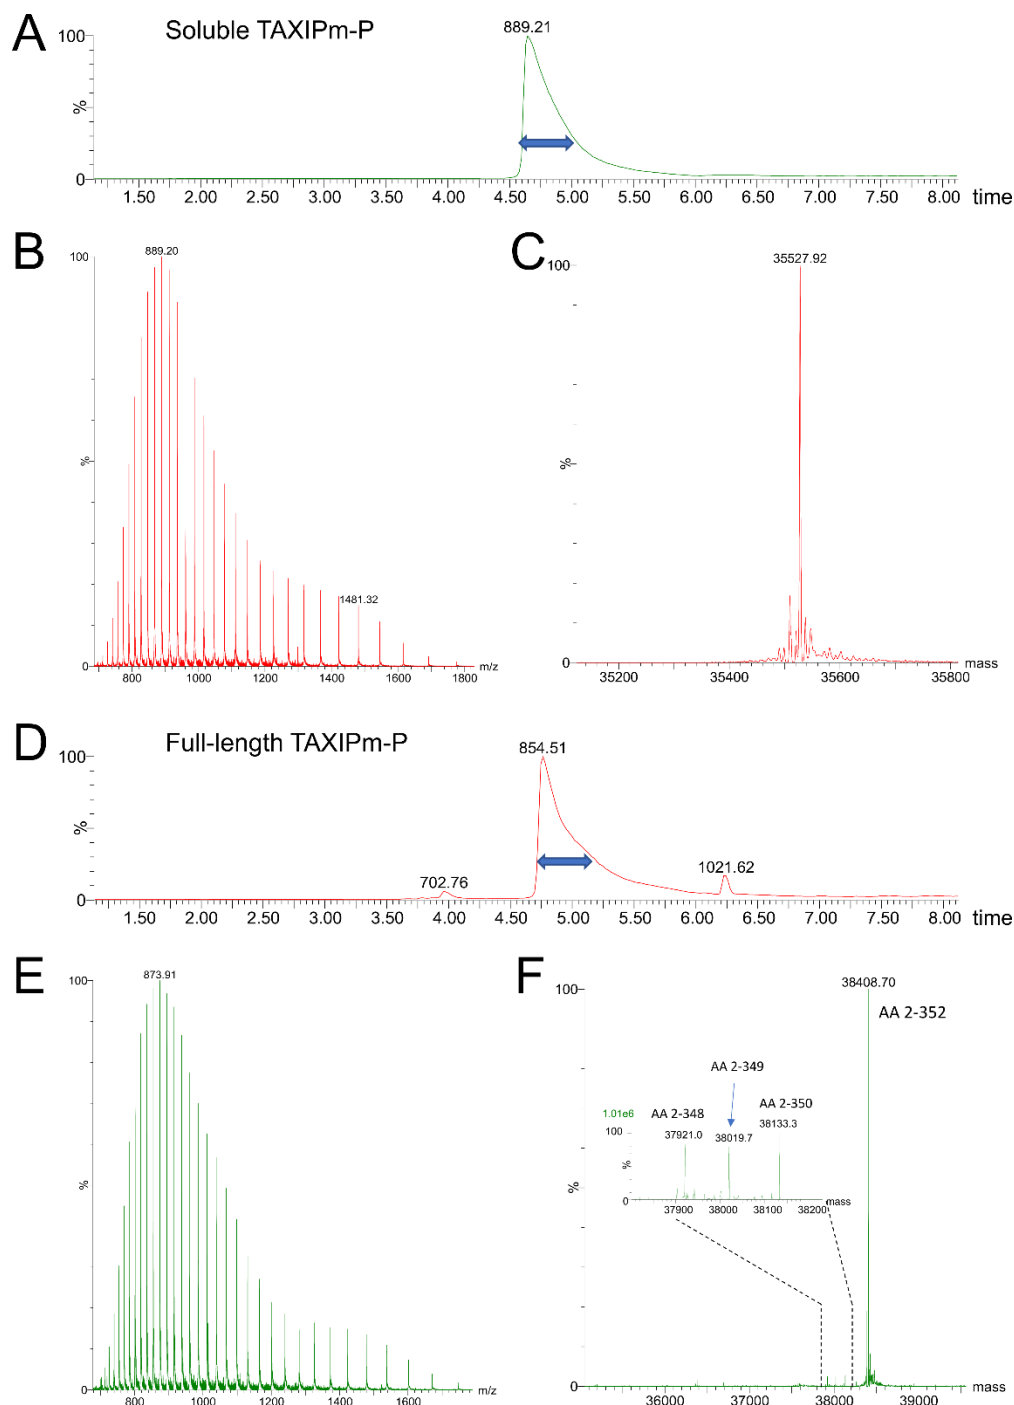

**Supplementary Fig. 5:** Intact protein mass analysis of soluble TAXIPm-P and full-length TAXIPm-P. **(A, C)** Chromatograms. **(B, E)** Summed-up spectra. **(C, F)** Deconvoluted spectra. The experimentally determined mass of soluble TAXIPm-P (35527.90 Da) is in good agreement of the expected mass (35527.75 Da). The experimentally determined mass of full-length TAXIPm-P (38408.70 Da) is in good agreement with the mass expected for the protein with its N-terminal Methionine excised (38539.57 Da). Some very low signals fit to C-terminally truncated species.

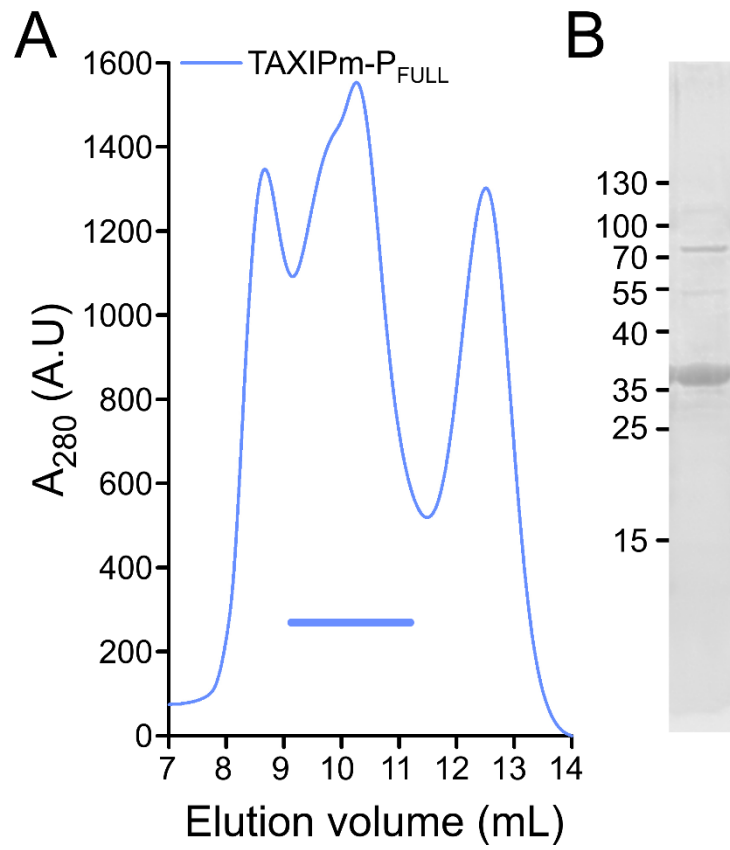

**Supplementary Fig. 6: (A)** Size-exclusion chromatography of TAXIPm-P in 0.05% (w/v) Triton X-100. Thick line below the curve indicates the fractions pooled and used for further analysis. **(B)** SDS-PAGE analysis of the SEC-peak fraction.

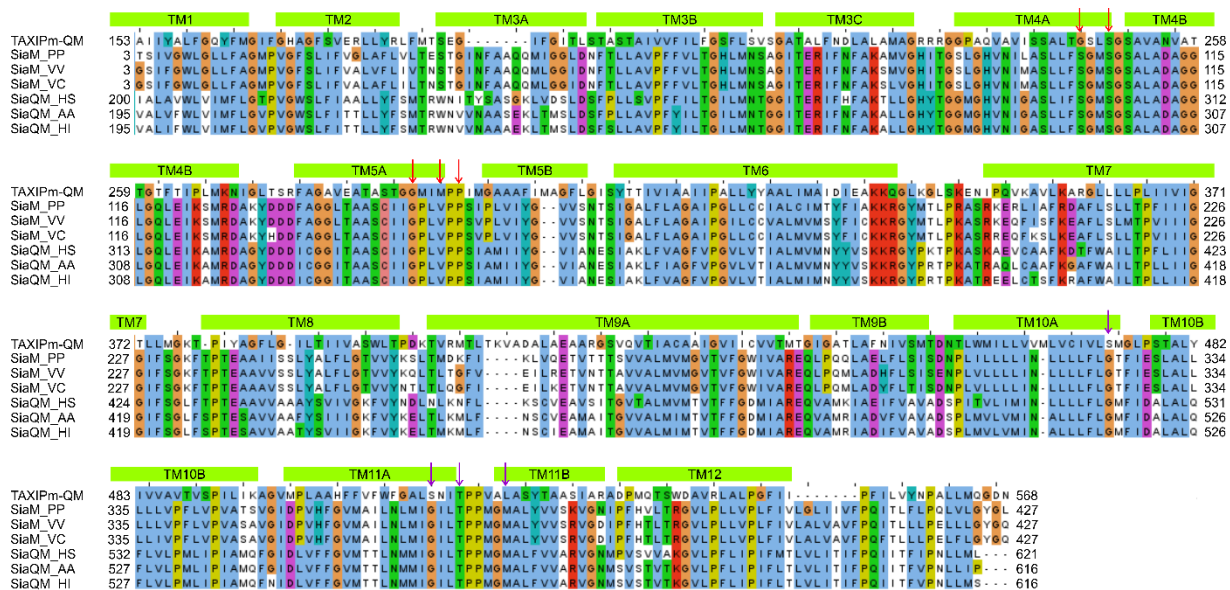

**Supplementary Fig. 7: Protein sequence alignment.** The sequence of TAXIPm-QM was aligned with the sequences of SiaM from *Photobacterium profundum* (PP; Q6LPW1), *Vibrio vulnificus* (VV; HAS8545205.1), *Vibrio cholerae* (VC; WP\_255122496.1), and the sequences of SiaQM from *Histophilus somni* (HS; WP\_249961534.1), *Aggregatibacter actinomycetemcomitans* (AA; MBN6066990.1), and *Haemophilus influenzae* (HI; WP\_048953901.1). The amino acid identity of TAXIPm-QM with these proteins ranges from 19.4 to 23.1%. Protein sequences were aligned using Clustal Omega. Red and purple arrows indicate residues involved in the potential Na<sup>+</sup> coordination sites as assigned by Davies *et al.* (Davies *et al.*, 2022). Green boxes indicate the position of the transmembrane segments for SiaM from *P. profundum* as assigned by Davies *et al.* (Davies *et al.*, 2022).
